# Supplementary material
Source: PubMed Central journal article supplement (PMC4645371)
Supplement: IAI.00924-15_zii999091466so1.pdf [file IAI.00924-15_zii999091466so1.pdf]

SUPPLEMENTARY TABLE. Virulence of *Salmonella* serovars for mice.

| Subspecies                            | Serogroup | Serovar               | Virulence*   | Ref             |        |
|---------------------------------------|-----------|-----------------------|--------------|-----------------|--------|
| <i>enterica</i>                       | O:2 (A)   | Paratyphi A           | -            | (1, 2)          |        |
|                                       |           | Abortusovis           | -            | (2)             |        |
|                                       | O:4 (B)   | Bredeney              | -            | (3)             |        |
|                                       |           | Derby                 | -            | (1)             |        |
|                                       |           | Heidelberg            | -            | (1, 3)          |        |
|                                       |           | Paratyphi B           | -            | (2)             |        |
|                                       |           | Paratyphi B var Java  | -            | (1), This study |        |
|                                       |           | Reading               | -            | (1), This study |        |
|                                       |           | Saintpaul             | -            | (1)             |        |
|                                       |           | Sandiego              | -            | (1)             |        |
|                                       |           | Schwarzengrund        | -            | (3)             |        |
|                                       |           | Stanley               | -            | (2)             |        |
|                                       |           | Stanleyville          | +            | This study      |        |
|                                       |           | Typhimurium           | +            | (1, 3)          |        |
|                                       |           | O:7 (C <sub>1</sub> ) | Braenderup   | -               | (2)    |
|                                       |           |                       | Choleraesuis | +               | (1, 3) |
|                                       |           |                       | Infantis     | -               | (2)    |
|                                       |           |                       | Montevideo   | -               | (1-3)  |
|                                       |           |                       | Ohio         | -               | (1)    |
|                                       |           |                       | Oranienburg  | -               | (1)    |
| Thompson                              | -         |                       | (2)          |                 |        |
| O:8 (C <sub>2</sub> -C <sub>3</sub> ) | Virchow   | -                     | (3)          |                 |        |
|                                       | Hadar     | -                     | (1, 3)       |                 |        |

|                   |                |   |                    |
|-------------------|----------------|---|--------------------|
|                   | Havana         | - | (1)                |
|                   | Muenchen       | - | (2)                |
|                   | Newport        | - | (1, 3)             |
| O:9 (D)           | Dublin         | + | (1, 3), This study |
|                   | Enteritidis    | + | (1-3)              |
|                   | Gallinarum     | - | (1)                |
|                   | Miami          | - | (2)                |
|                   | Naestved       | + | (1)                |
|                   | Panama         | - | This study         |
|                   | Sendai         | - | (2)                |
|                   | Typhi          | - | (2) (1)            |
|                   | 9,12:l,v:-     | - | (3)                |
| O:3,10 (E)        | Muenster       | - | (2)                |
|                   | Give var 15+   | - | (1)                |
|                   | (Newbrunswick) |   |                    |
| O:13 (G)          | Poona          | - | (2)                |
| O:21 (L)          | Minnesota      | - | (1)                |
| <i>salamae</i>    |                | - | (2)                |
| <i>arizonae</i>   |                | - | (2)                |
| <i>diarizonae</i> |                | - | (2)                |
| <i>houtenae</i>   |                | - | (2)                |
| <i>indica</i>     |                | - | (2)                |

\* Virulence was determined by infecting BALB/c mice i.p. with  $10^5$  CFU (1) or  $10^7 - 10^9$  CFU (this study) or intragastrically with  $10^9$  CFU (2), or C3H/HeN mice i.p. with  $\sim 5 \times 10^3$  CFU (3).

## REFERENCES

1. **Roudier C, Krause M, Fierer J, Guiney DG.** 1990. Correlation between the presence of sequences homologous to the *vir* region of *Salmonella dublin* plasmid pSDL2 and the virulence of twenty-two *Salmonella* serotypes in mice. *Infect Immun* **58**:1180-1185.
2. **Swearingen MC, Porwollik S, Desai PT, McClelland M, Ahmer BM.** 2012. Virulence of 32 *Salmonella* strains in mice. *PLoS One* **7**:e36043.
3. **Suez J, Porwollik S, Dagan A, Marzel A, Schorr YI, Desai PT, Agmon V, McClelland M, Rahav G, Gal-Mor O.** 2013. Virulence gene profiling and pathogenicity characterization of non-typhoidal *Salmonella* accounted for invasive disease in humans. *PLoS One* **8**:e58449.
